# Supplementary material for: Aquatic community structure as sentinel of recent environmental changes unraveled from lake sedimentary records from the Atacama Desert, Chile
Source: PLOS journal article supplement (doi:10.1371/journal.pone.0229453), 2020-02-21
Supplement: S3 (10.1371/journal.pone.0229453.s003) [file journal.pone.0229453.s003]

Supporting information: Appendix S3. Adriana Aránguiz-Acuña, José A. Luque, Héctor Pizarro, Mauricio Cerda, Inger Heine-Fuster, Jorge Valdés, Emma Fernández-Galego, Volker Wennrich

**Aquatic community structure as sentinel of recent environmental changes unraveled from sedimentary records from an Atacama Desert Lake, Chile**

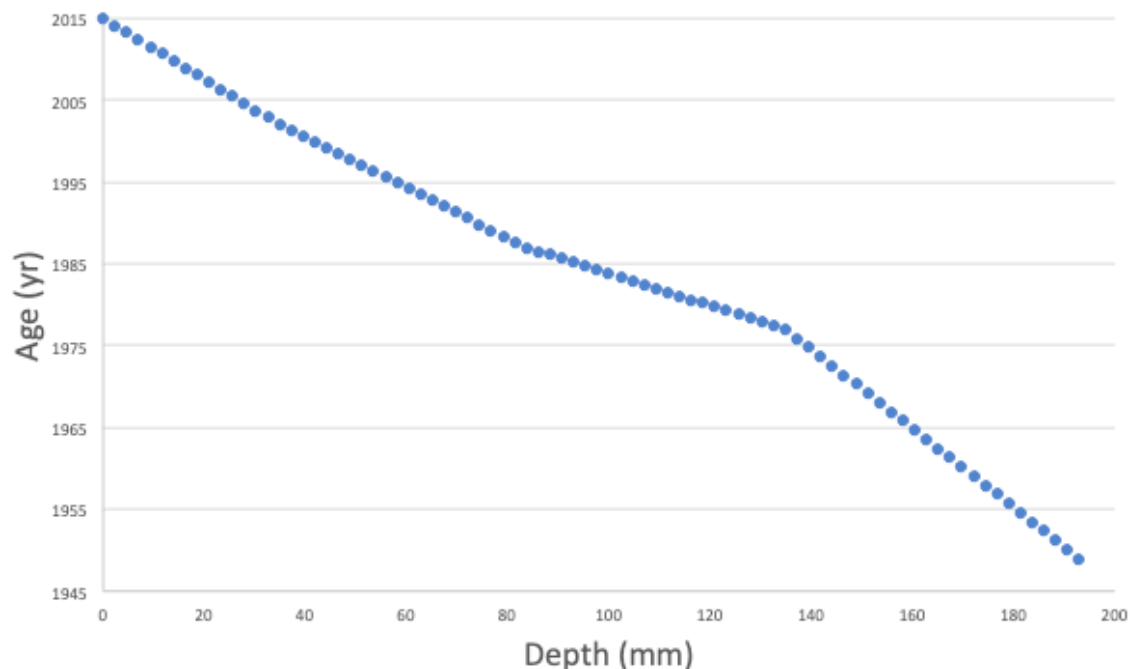

**S3 Fig. Age-Depth model for CORE2.** According to correlation between CORE1 and CORE2, chronological model for CORE2 is obtained.
